# Supplementary material for: Stability study of a superbase-derived ionic liquid [mTBNH][OAc] with enhanced cellulose dissolution ability: thermal and natural degradation
Source: Royal Society of Chemistry journal article supplement (doi:10.1039/d4su00087k), 2024-01-01
Supplement: d4su00087k1.pdf [file d4su00087k1.pdf]

## Supplementary material

### **Stability Study of a Superbase-derived Ionic Liquid [mTBNH][OAc] with Enhanced Cellulose Dissolution Ability: Thermal and Natural Degradation**

Ivan Melikhov<sup>1</sup>, Irina Sulaeva<sup>1,2</sup>, Stefano Barbini<sup>1</sup>, Markus Bacher<sup>1</sup>, Dev Sriranganadane<sup>1</sup>,  
Ilkka Kilpeläinen<sup>3</sup>, Thomas Rosenau<sup>1</sup>, Antje Potthast<sup>\*1</sup>

<sup>1</sup>University of Natural Resources and Life Sciences, Vienna, (BOKU); Department of Chemistry, Institute for Chemistry of Renewable Resources; Konrad-Lorenz Strasse 24, 3430 Tulln an der Donau, Austria

<sup>2</sup>University of Natural Resources and Life Sciences, Vienna, (BOKU); Core Facility Analysis of Lignocellulosics (Alice); Konrad-Lorenz Strasse 24, 3430 Tulln an der Donau, Austria

<sup>3</sup>University of Helsinki, Department of Chemistry, Helsinki Institute of Sustainability Science (HELSUS), Yliopistonkatu 3, 00014, Helsingin yliopisto, Finland

\*corresponding author: [antje.potthast@boku.ac.at](mailto:antje.potthast@boku.ac.at)

## Thermal degradation by-products

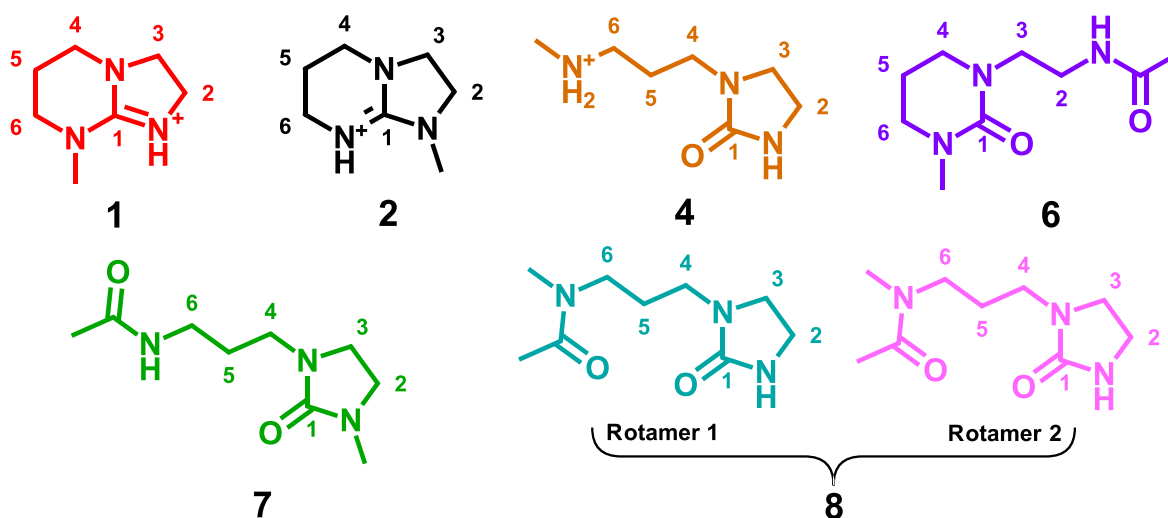

**Figure S1.** By-products of thermally aged (95°C, 20 days, 10 % wt water) [mTBNH][OAc] sample. Structural confirmation was achieved by means of  $^1\text{H}$  and  $^{13}\text{C}$  NMR spectroscopy.

**Table S1:**  $^1\text{H}$  chemical shifts of thermal by-products of [mTBNH][OAc].

| Pos.               | 1    | 2    | 4    | 6    | 7    | 8 rotamer-1 | 8 rotamer-2 |
|--------------------|------|------|------|------|------|-------------|-------------|
| 2                  | 3.49 | 3.45 | 3.19 | 3.09 | 3.20 | n.d.        | n.d.        |
| 3                  | 3.52 | 3.51 | 3.28 | 3.19 | 3.20 | n.d.        | n.d.        |
| 4                  | 3.17 | 3.24 | 3.03 | 3.22 | 3.03 | 3.02        | 2.97        |
| 5                  | 1.95 | 1.84 | 1.58 | 1.83 | 1.53 | 1.67        | 1.57        |
| 6                  | 3.24 | 3.22 | 2.48 | 3.16 | 2.98 | 3.23        | 3.21        |
| N-CH <sub>3</sub>  | 2.98 | 2.89 | 2.27 | 2.75 | 2.61 | 2.76        | 2.92        |
| Ac-CH <sub>3</sub> | -    | -    | -    | 1.76 | 1.77 | 1.95        | 1.94        |

n.d. = not detected due to signal overlap

**Table S2:**  $^{13}\text{C}$  chemical shifts of thermal by-products of [mTBNH][OAc].

| Pos.               | 1      | 2      | 4      | 6      | 7      | 8 rotamer-1 | 8 rotamer-2 |
|--------------------|--------|--------|--------|--------|--------|-------------|-------------|
| 1                  | 156.61 | 155.07 | 162.43 | 155.62 | 161.18 | 162.47      | 162.37      |
| 2                  | 41.03  | 47.68  | 37.56  | 37.28  | n.d.   | n.d.        | n.d.        |
| 3                  | 49.05  | 46.88  | 44.49  | 47.24  | 42.21  | n.d.        | n.d.        |
| 4                  | 41.74  | 37.92  | 40.94  | 46.29  | 41.77  | 40.67       | 40.94       |
| 5                  | 20.43  | 19.82  | 26.31  | 22.01  | 27.42  | 26.09       | 25.32       |
| 6                  | 46.54  | 42.27  | 47.95  | 47.40  | 36.41  | 47.58       | 44.58       |
| N-CH <sub>3</sub>  | 37.20  | 31.73  | 34.93  | 35.24  | 31.22  | 32.55       | 35.83       |
| Ac-CO              | -      | -      | -      | 169.34 | 169.15 | 169.38      | 169.61      |
| Ac-CH <sub>3</sub> | -      | -      | -      | 22.71  | 22.71  | 21.14       | 21.82       |

n.d. = not detected due to signal overlap



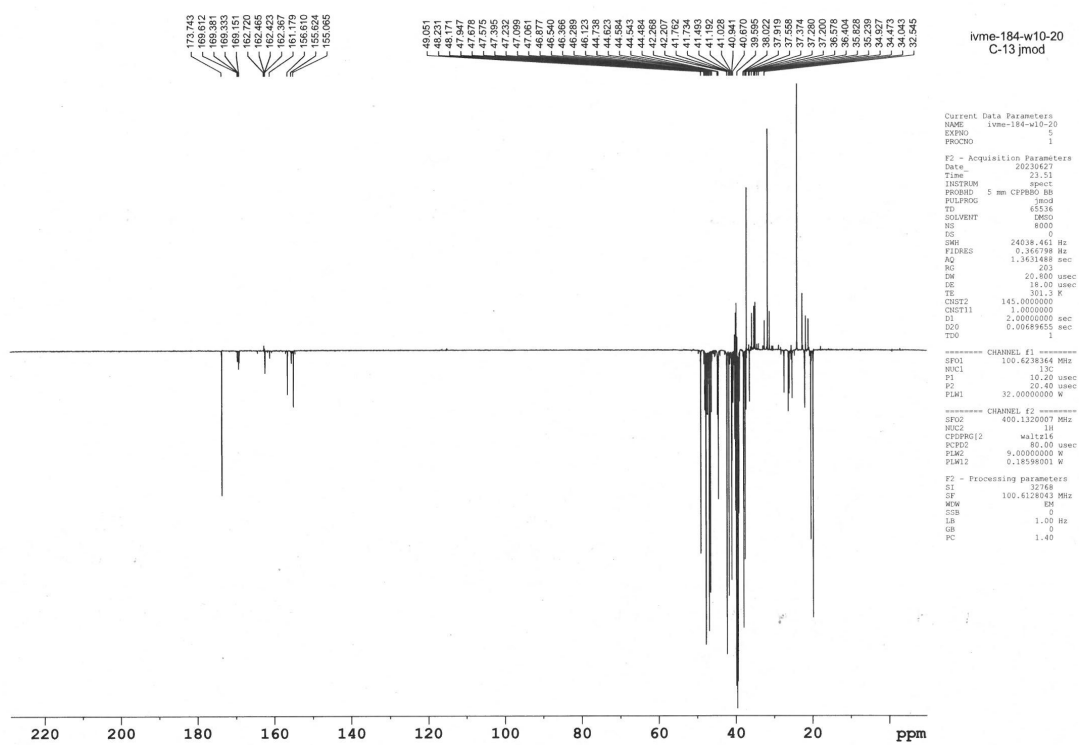

Figure S4. <sup>13</sup>C NMR spectrum of thermally aged (95°C, 20 days, 10 % wt water) [mTBNH][OAc] sample.

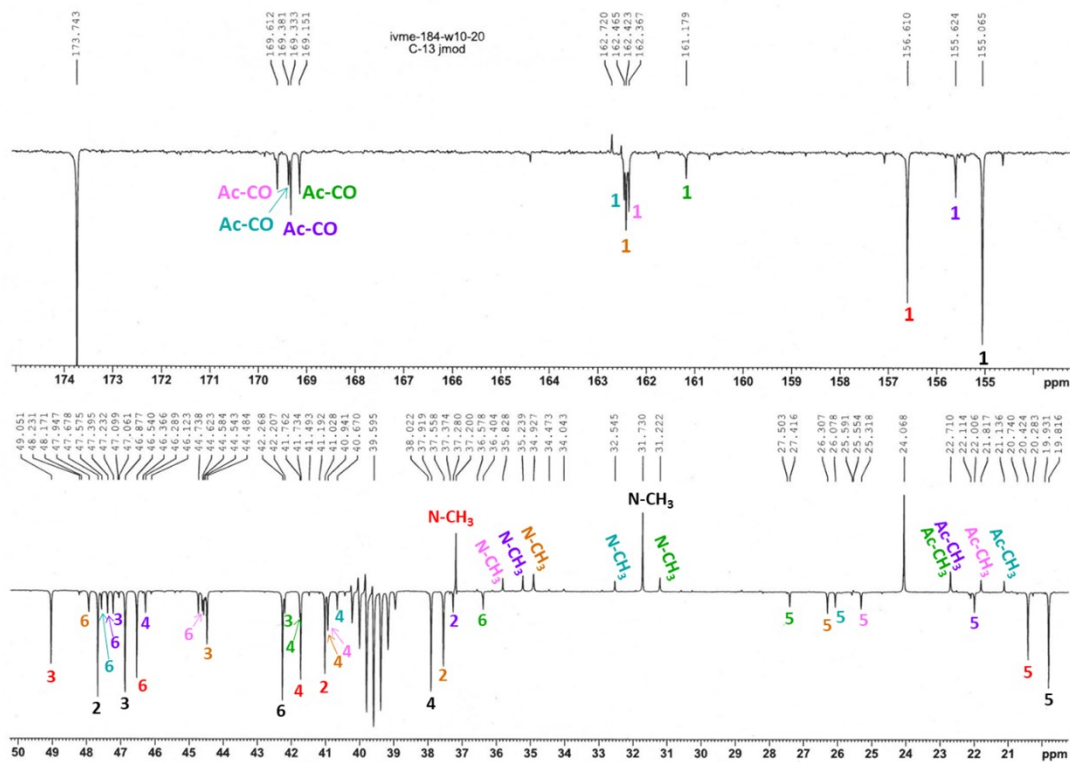

Figure S5. <sup>13</sup>C NMR spectrum of thermally aged (95°C, 20 days, 10 % wt water) [mTBNH][OAc] sample with assigned peaks.

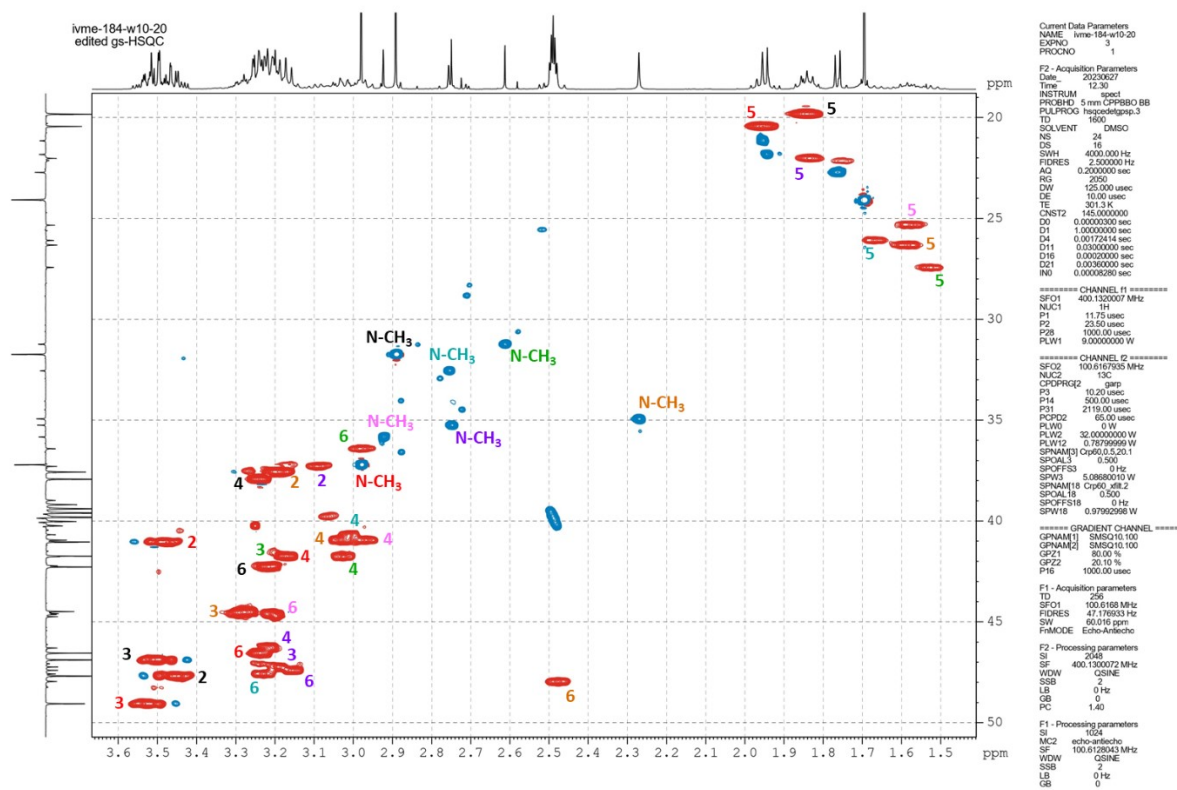

Figure S6. HSQC spectrum of thermally aged (95°C, 20 days, 10 % wt water) [mTBNH][OAc] sample with assigned peaks.

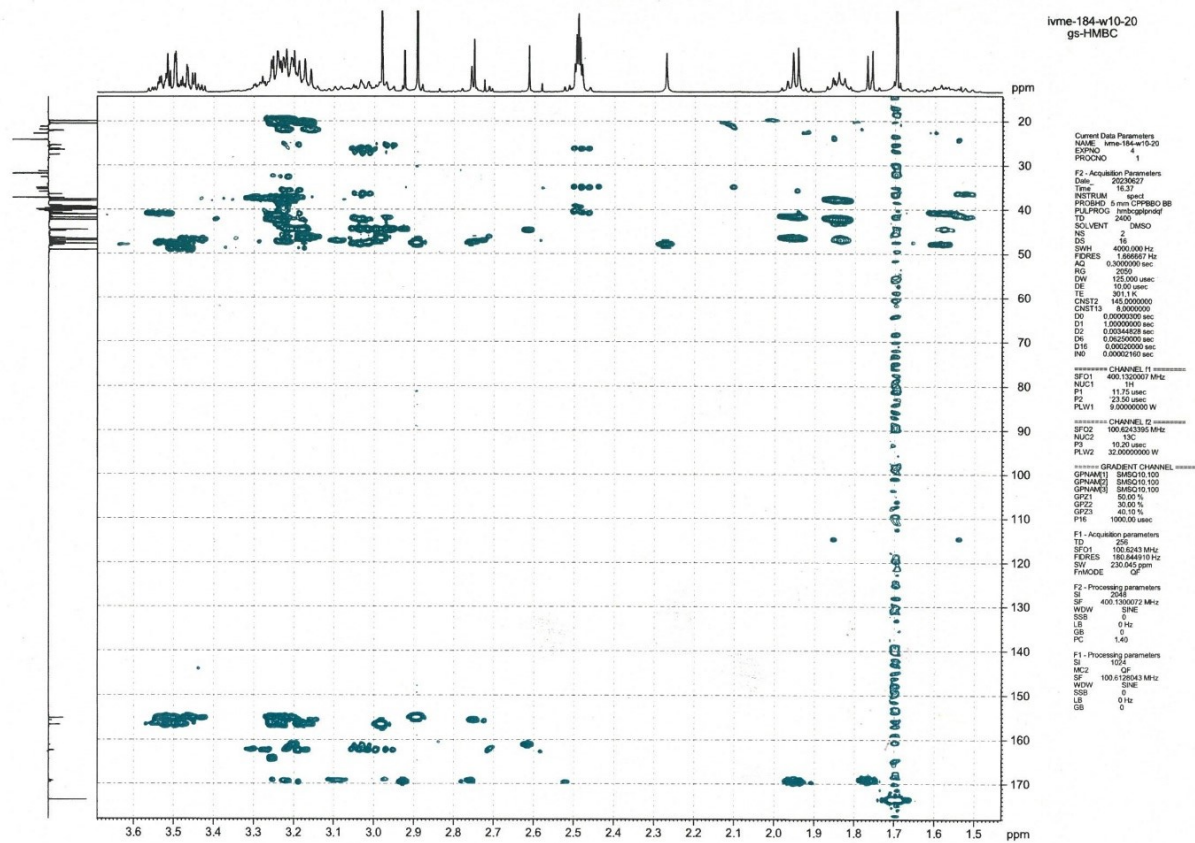

thermally aged (95°C, 20 days, 10 % wt water) [mTBNH][OAc] sample.

Figure S7. HMBC spectrum of

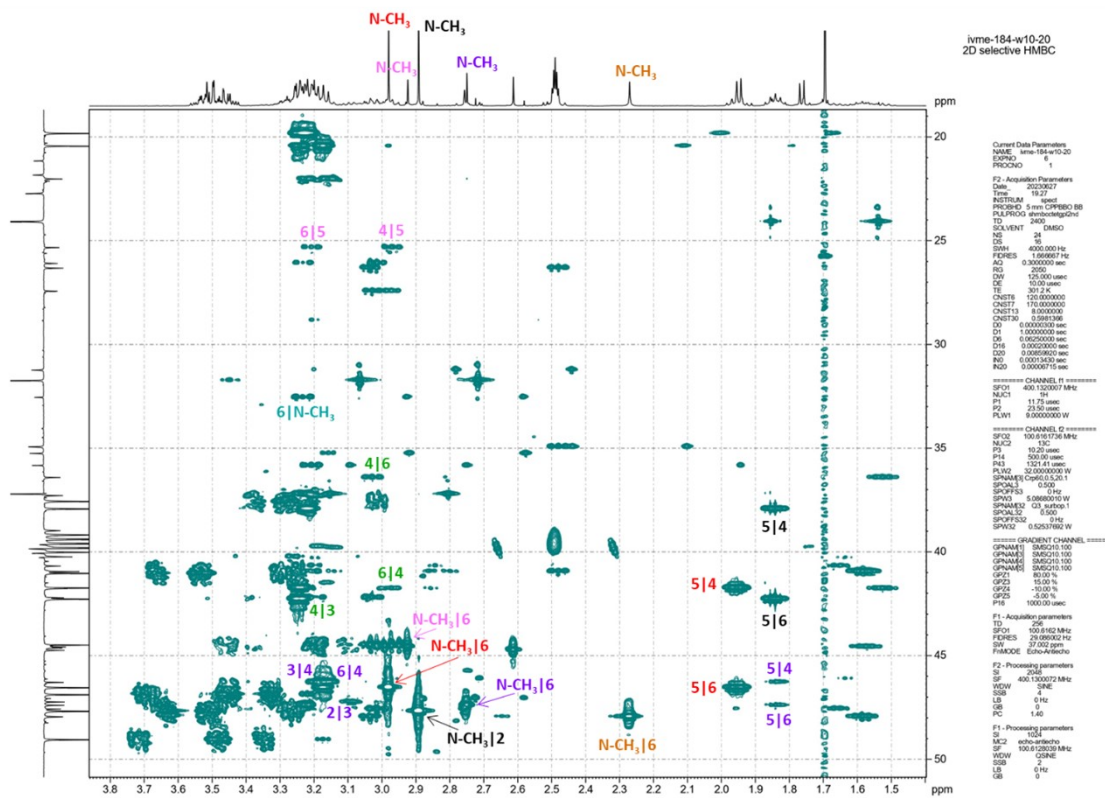

**Figure S8.** 2D selective HMBC spectrum of thermally aged (95°C, 20 days, 10 % wt water) [mTBNH][OAc] sample with assigned peaks.

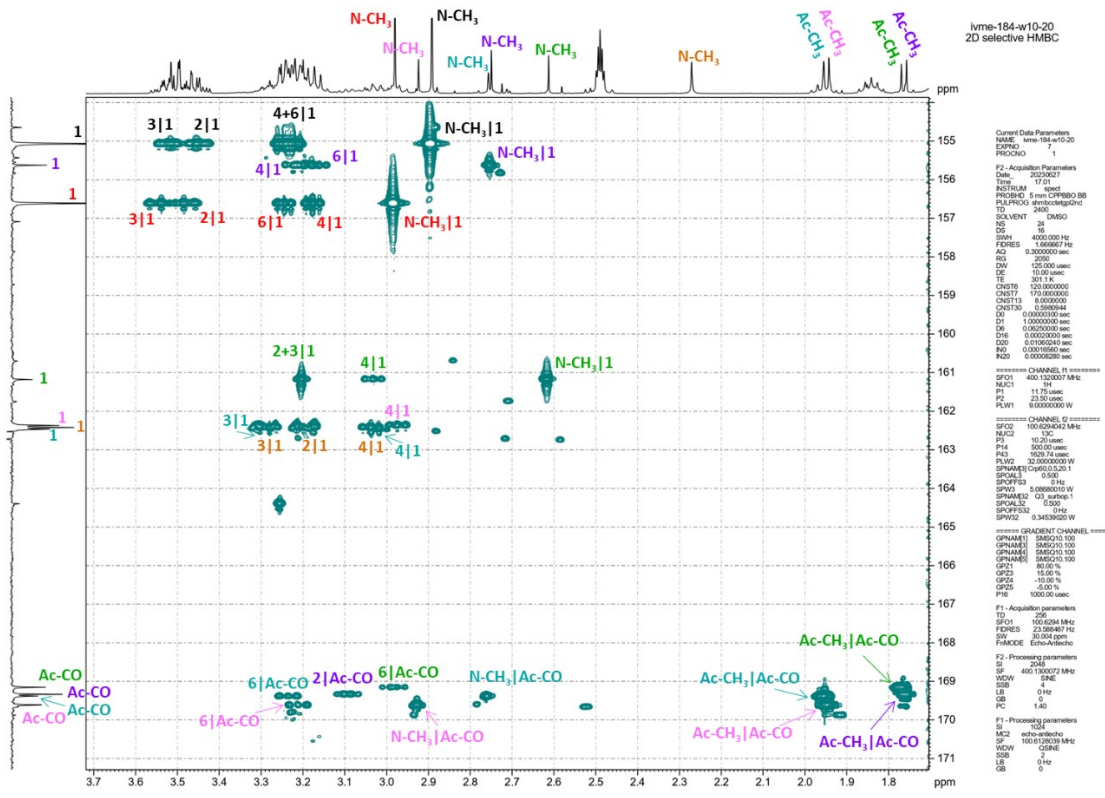

**Figure S9.** 2D selective HMBC spectrum of thermally aged (95°C, 20 days, 10 % wt water) [mTBNH][OAc] sample with assigned peaks.

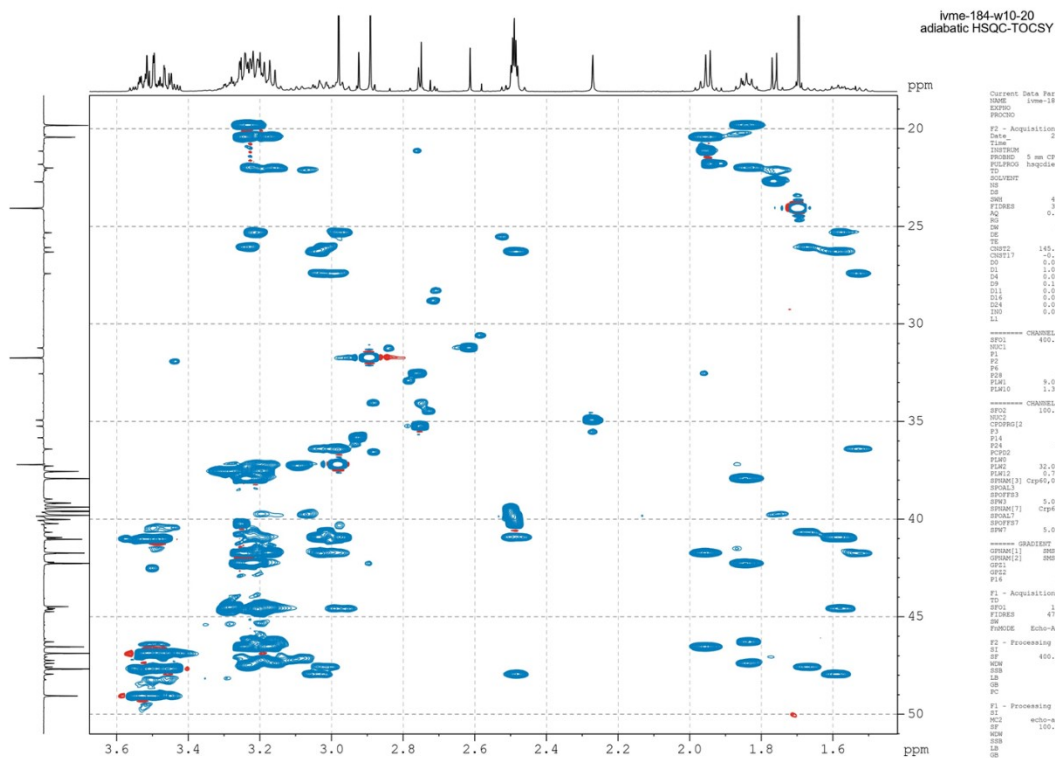

Figure S10. HSQC-TOCSY spectrum of thermally aged (95°C, 20 days, 10 % wt water) [mTBNH][OAc] sample.

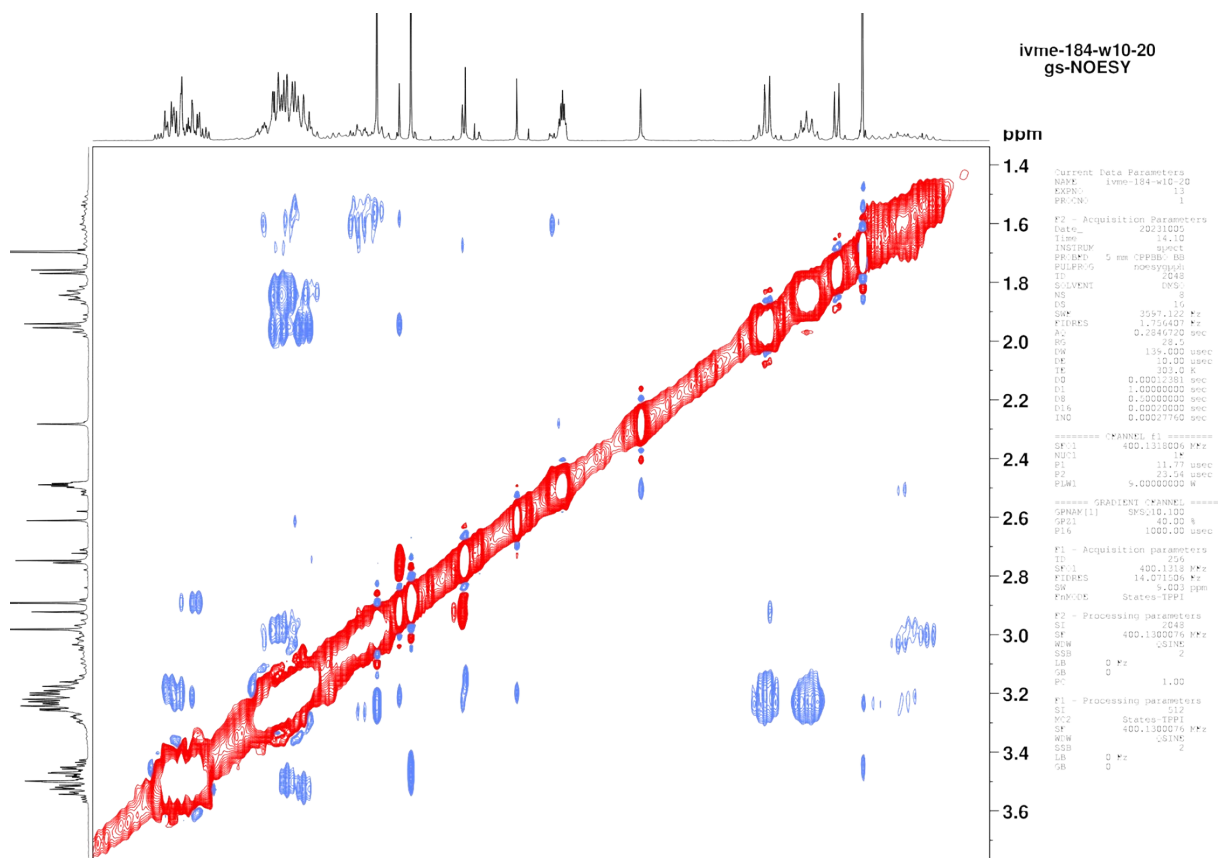

Figure S11. NOESY spectrum of thermally aged (95°C, 20 days, 10 % wt water) [mTBNH][OAc] sample.



## Natural degradation by-products

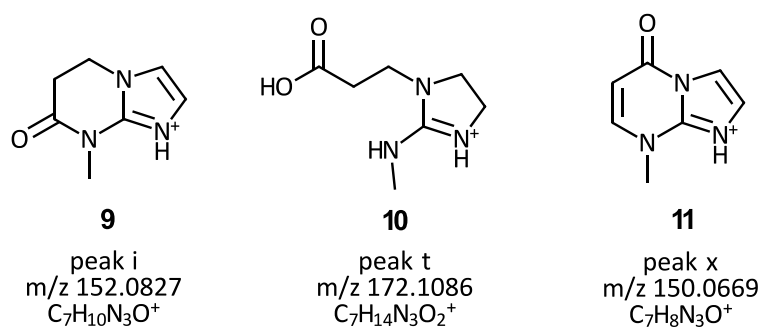

**Figure S12.** By-products isolated by means of flash column chromatography from a naturally aged [mTBNH][OAc] sample (rt, no light, 2 years). Structural confirmation was achieved by means of <sup>1</sup>H and <sup>13</sup>C NMR spectroscopy. Peaks names relate to Figure 6, Table 1 and Scheme 2.

### 7-Methyl-4,5-dihydro-1,3a,7-triaza-1-indenium-6(7H)-one (9)

<sup>1</sup>H NMR (400 MHz, CD<sub>3</sub>OD) δ 6.88 (d, *J* = 1.6 Hz, 1H), 6.79 (d, *J* = 1.6 Hz, 1H), 4.12 (t, *J* = 7.1 Hz, 2H), 3.34 (s, 3H), 2.90 (t, *J* = 7.1 Hz, 2H). <sup>13</sup>C NMR (101 MHz, CD<sub>3</sub>OD) δ 168.71, 145.23, 126.14, 117.92, 40.26, 32.00, 29.04. ESI-QToF-MS: *m/z* calcd for C<sub>7</sub>H<sub>10</sub>N<sub>3</sub>O<sup>+</sup> (M<sup>+</sup>) 152.0823, found 152.0827.

### 3-[2-(Methylamino)-2-imidazolidinyl-1-yl]propionate (10)

<sup>1</sup>H NMR (400 MHz, CD<sub>3</sub>OD) δ 3.77–3.71 (m, 2H), 3.67–3.61 (m, 2H), 3.49 (t, *J* = 12.2 Hz, 2H), 2.88 (s, 3H), 2.42 (t, *J* = 12.2 Hz, 2H). <sup>13</sup>C NMR (101 MHz, CD<sub>3</sub>OD) δ 178.93, 160.70, 49.72, 43.96, 42.07, 36.43, 29.18. ESI-QToF-MS: *m/z* calcd for C<sub>7</sub>H<sub>14</sub>N<sub>3</sub>O<sub>2</sub><sup>+</sup> (M<sup>+</sup>) 172.1086, found 172.1086.

### 7-Methyl-1,3a,7-triaza-1-indenium-4(7H)-one (11)

<sup>1</sup>H NMR (400 MHz, CD<sub>3</sub>OD) δ 7.88 (d, *J* = 7.6 Hz, 1H), 7.67 (d, *J* = 1.7 Hz, 1H), 7.27 (d, *J* = 1.7 Hz, 1H), 5.84 (d, *J* = 7.6 Hz, 1H), 3.83 (s, 3H). <sup>13</sup>C NMR (101 MHz, CD<sub>3</sub>OD) δ 160.14, 145.20, 144.96, 129.85, 110.71, 96.95, 38.58. ESI-QToF-MS: *m/z* calcd for C<sub>7</sub>H<sub>8</sub>N<sub>3</sub>O<sup>+</sup> (M<sup>+</sup>) 150.0667, found 150.0669.

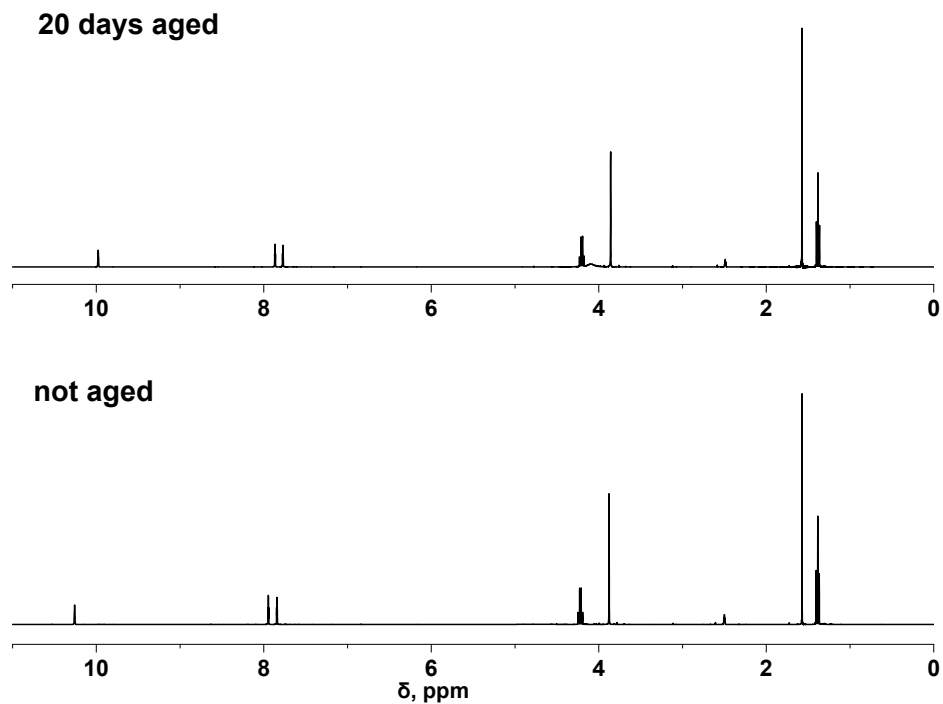

Figure S13.  $^1\text{H}$  NMR of fresh and aged (20 days, 95°C, 10 % wt water) [Emim][OAc] samples.

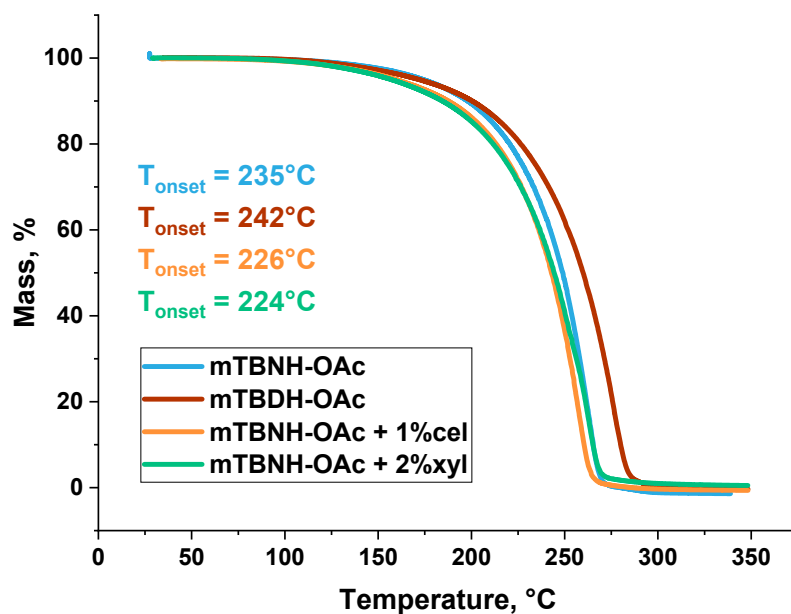

Figure S14. Dynamic decomposition curves of [mTBDH][OAc] and [mTBNH][OAc] (pure and with additives) obtained from thermogravimetric analysis in nitrogen atmosphere at ramp mode (ramp 10°C/min to 350°C).

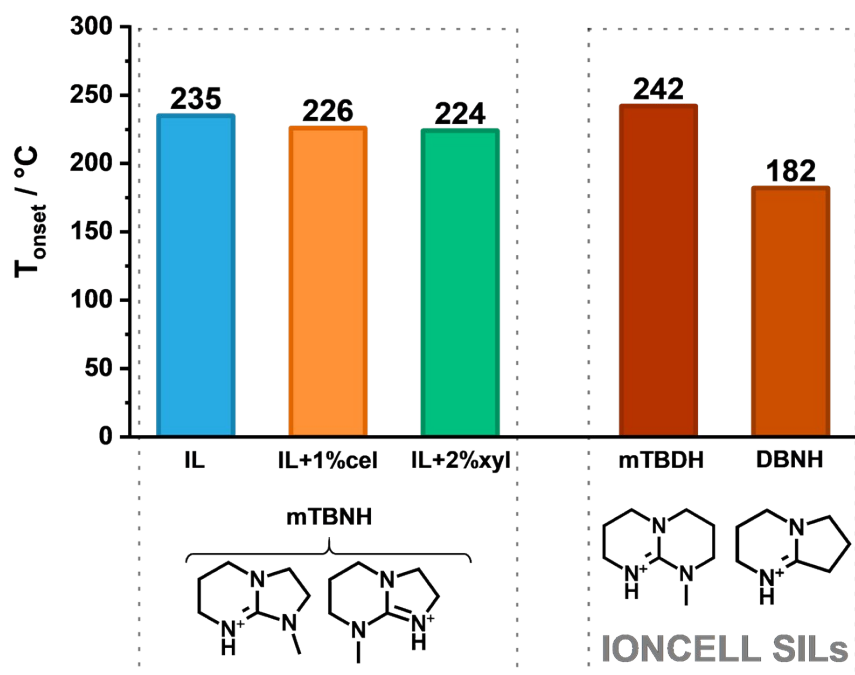

**Figure S15.** Thermal temperature of decomposition ( $T_{\text{onset}}$ ) of SILs.  $T_{\text{onset}}$  of [DBNH][OAc] was measured by Kuzmina et al.<sup>1</sup>

#### Reference

- O. Kuzmina, J. Bhardwaj, S. R. Vincent, N. D. Wanasekara, L. M. Kalossaka, J. Griffith, A. Potthast, S. Rahatekar, S. J. Eichhorn and T. Welton, *Green Chem.*, 2017, **19**, 5949–5957.
